# Supplementary material for: Histone methyltransferase Smyd2 drives adipogenesis via regulating STAT3 phosphorylation
Source: PubMed Central journal article supplement (PMC9586978; doi:10.1038/s41419-022-05321-7), 2022-10-21

# Figure 1

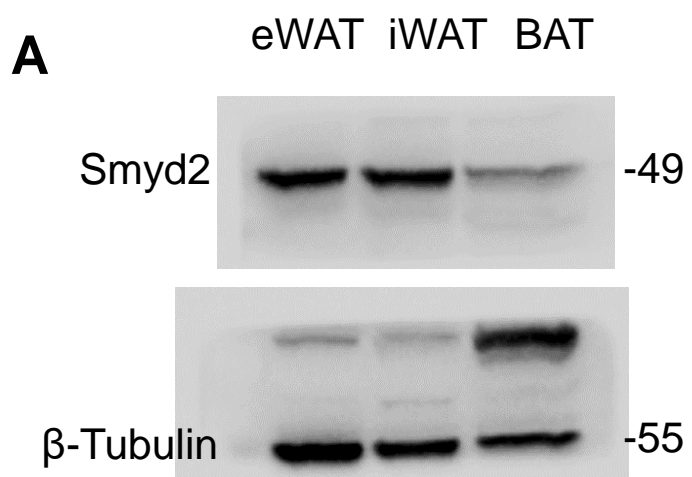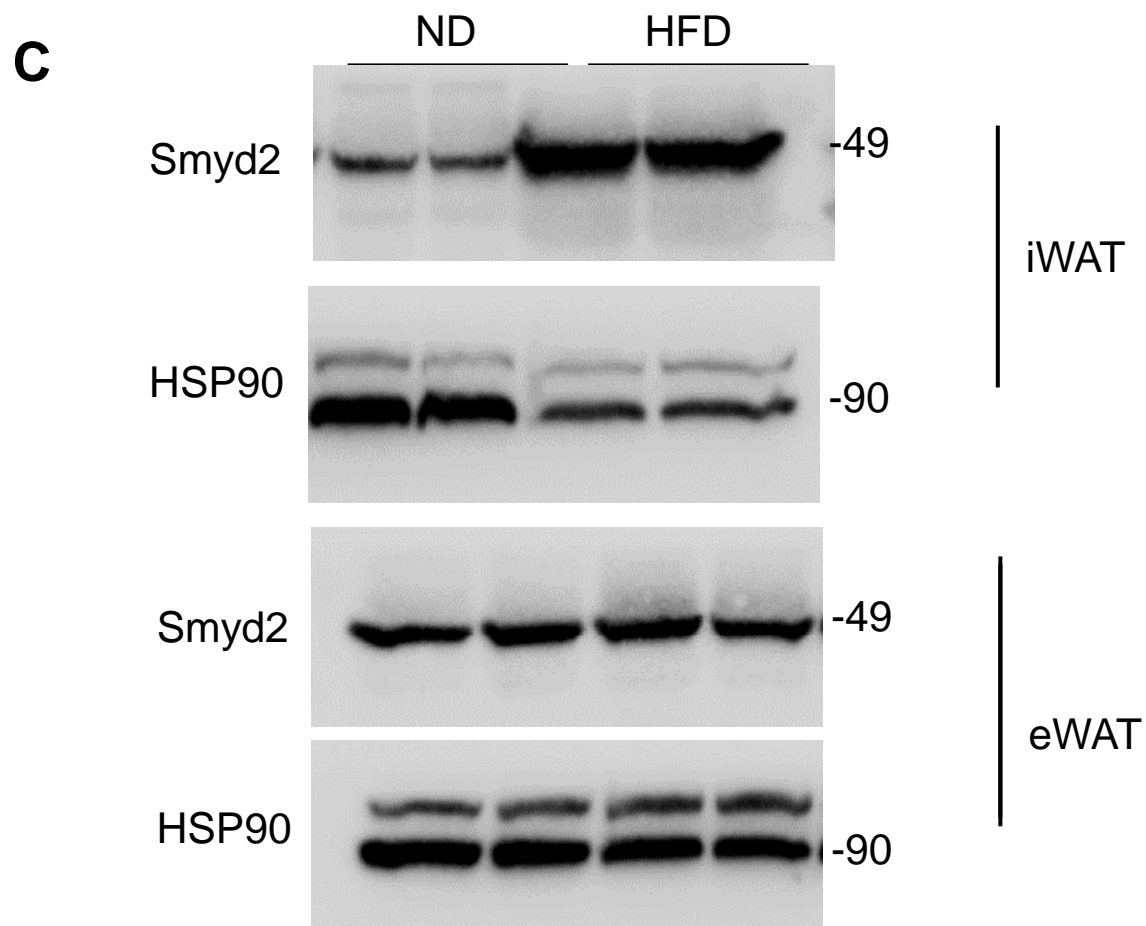

**Figure 2**

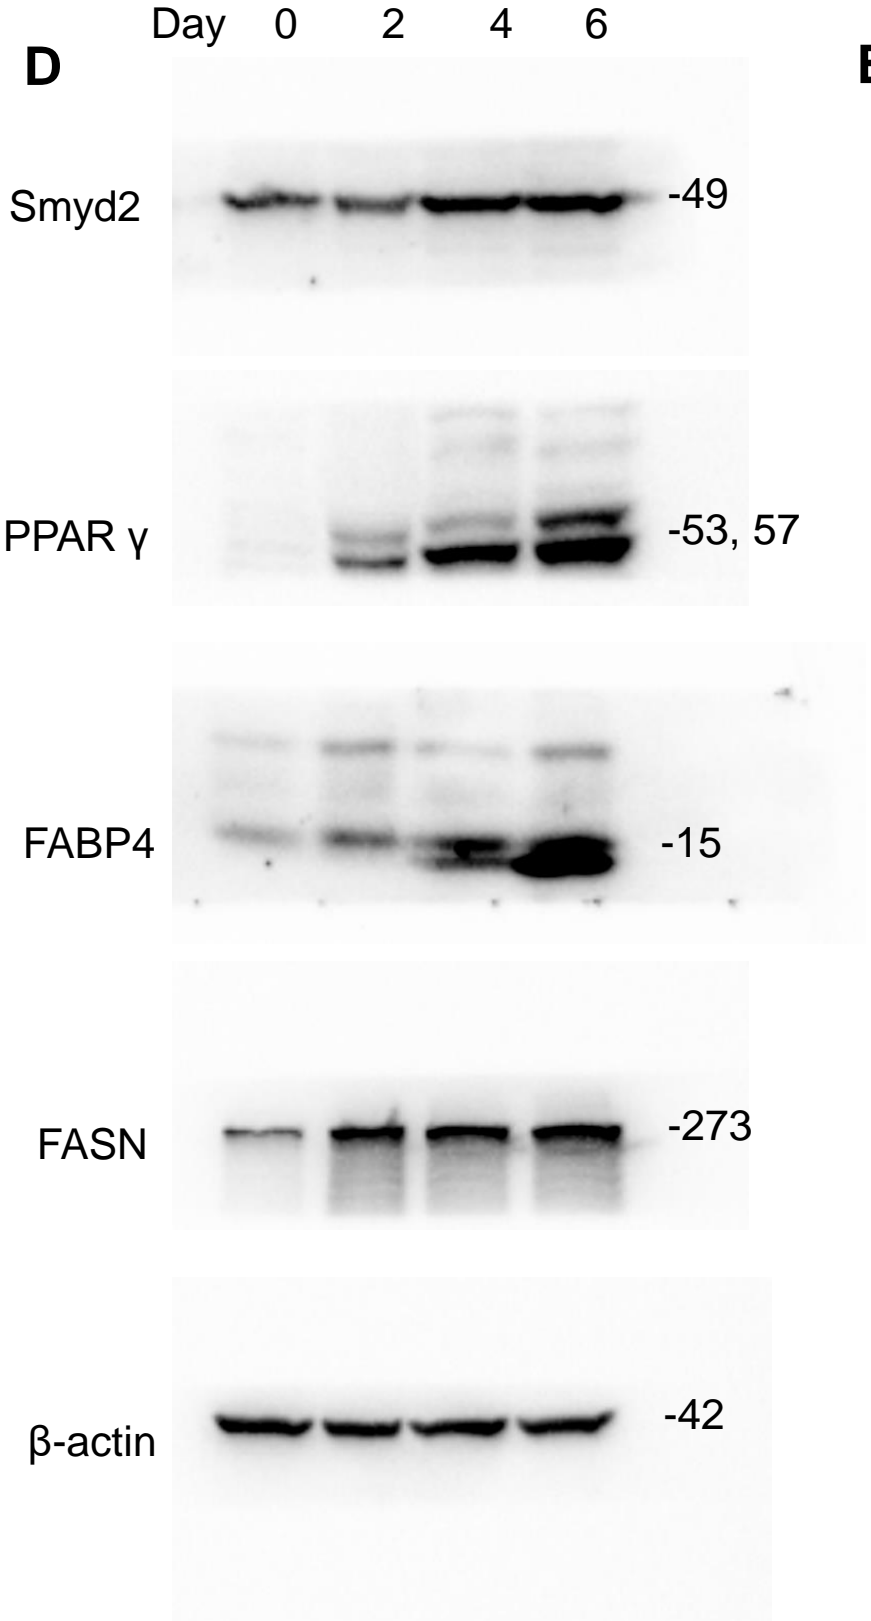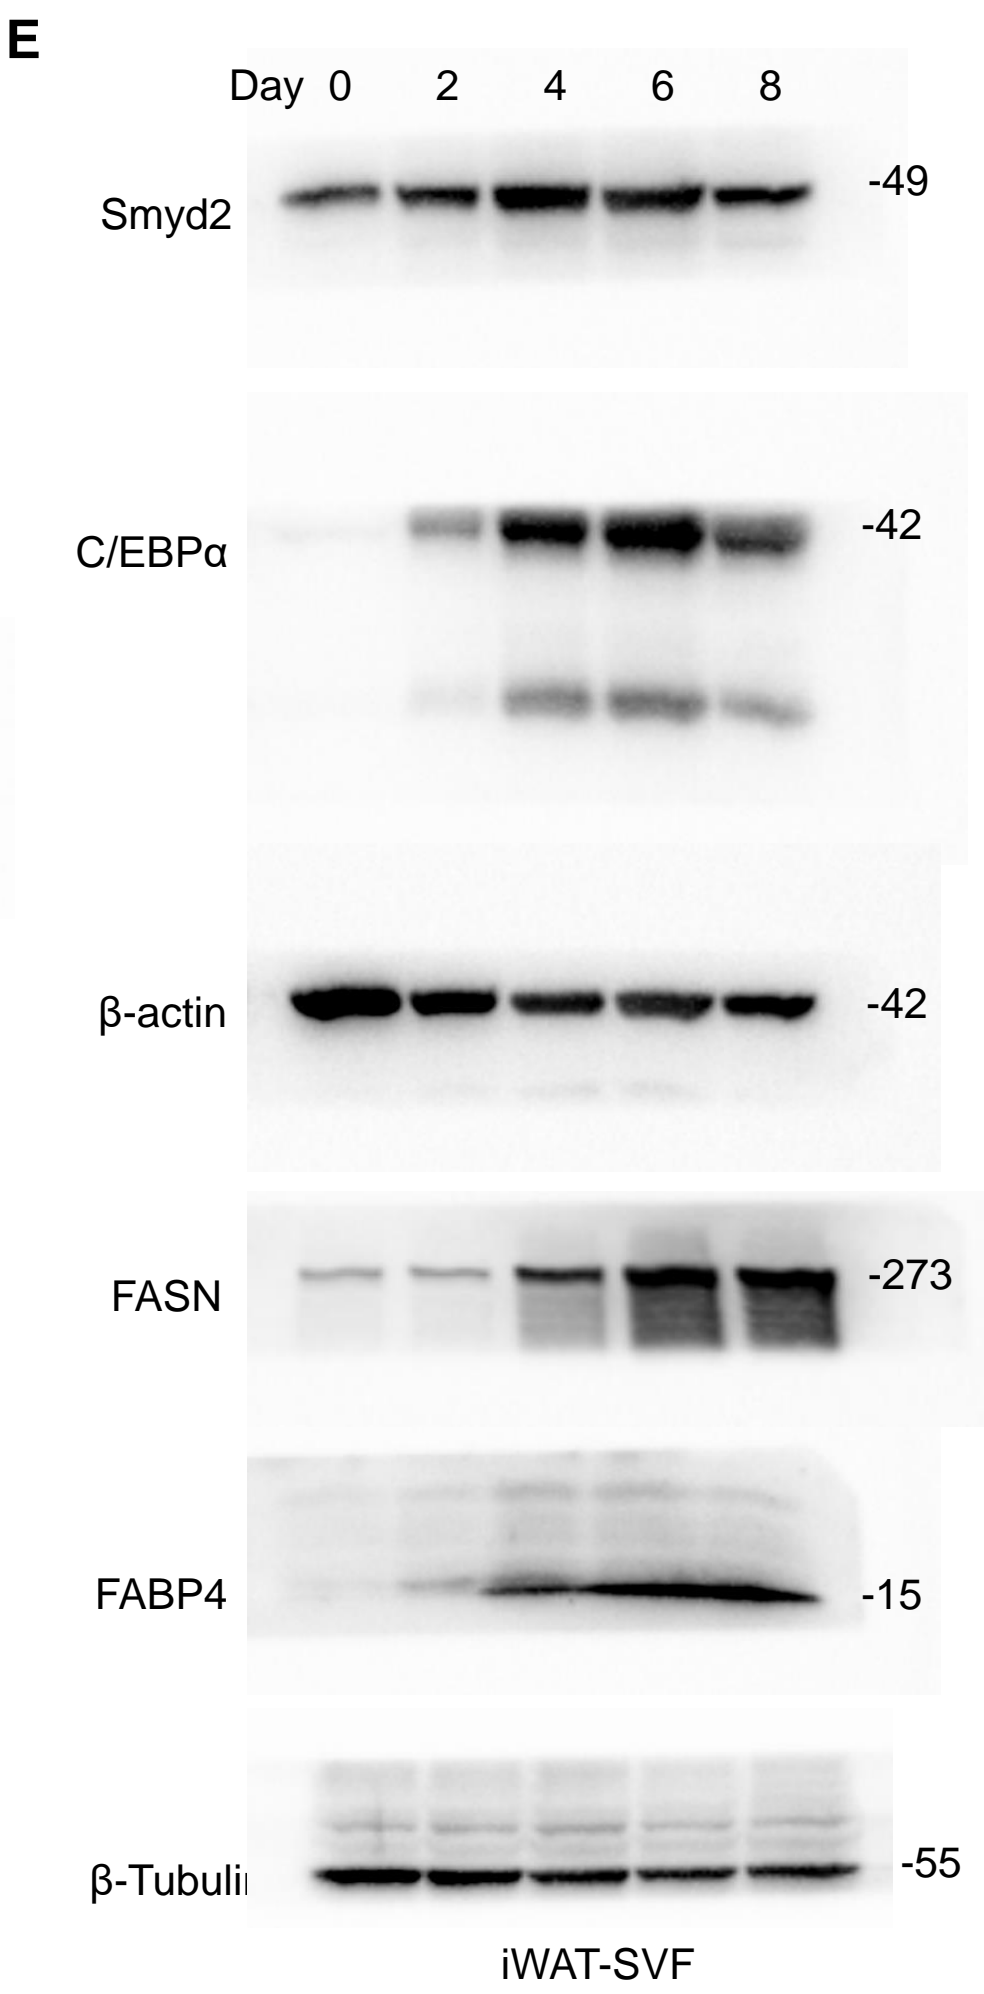

**Figure 3**

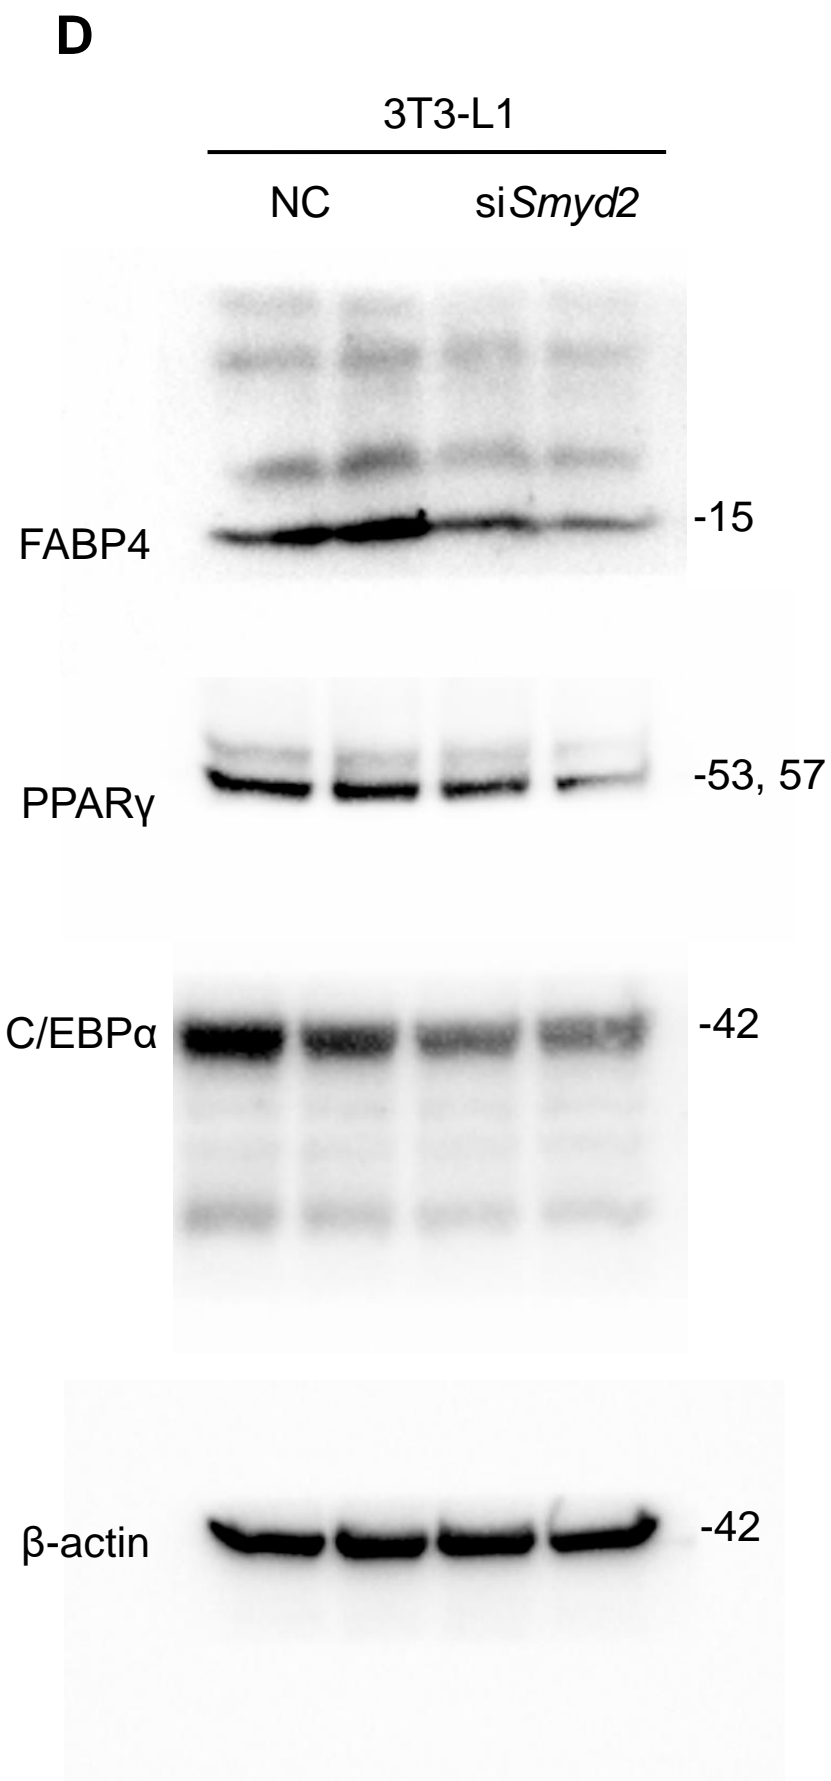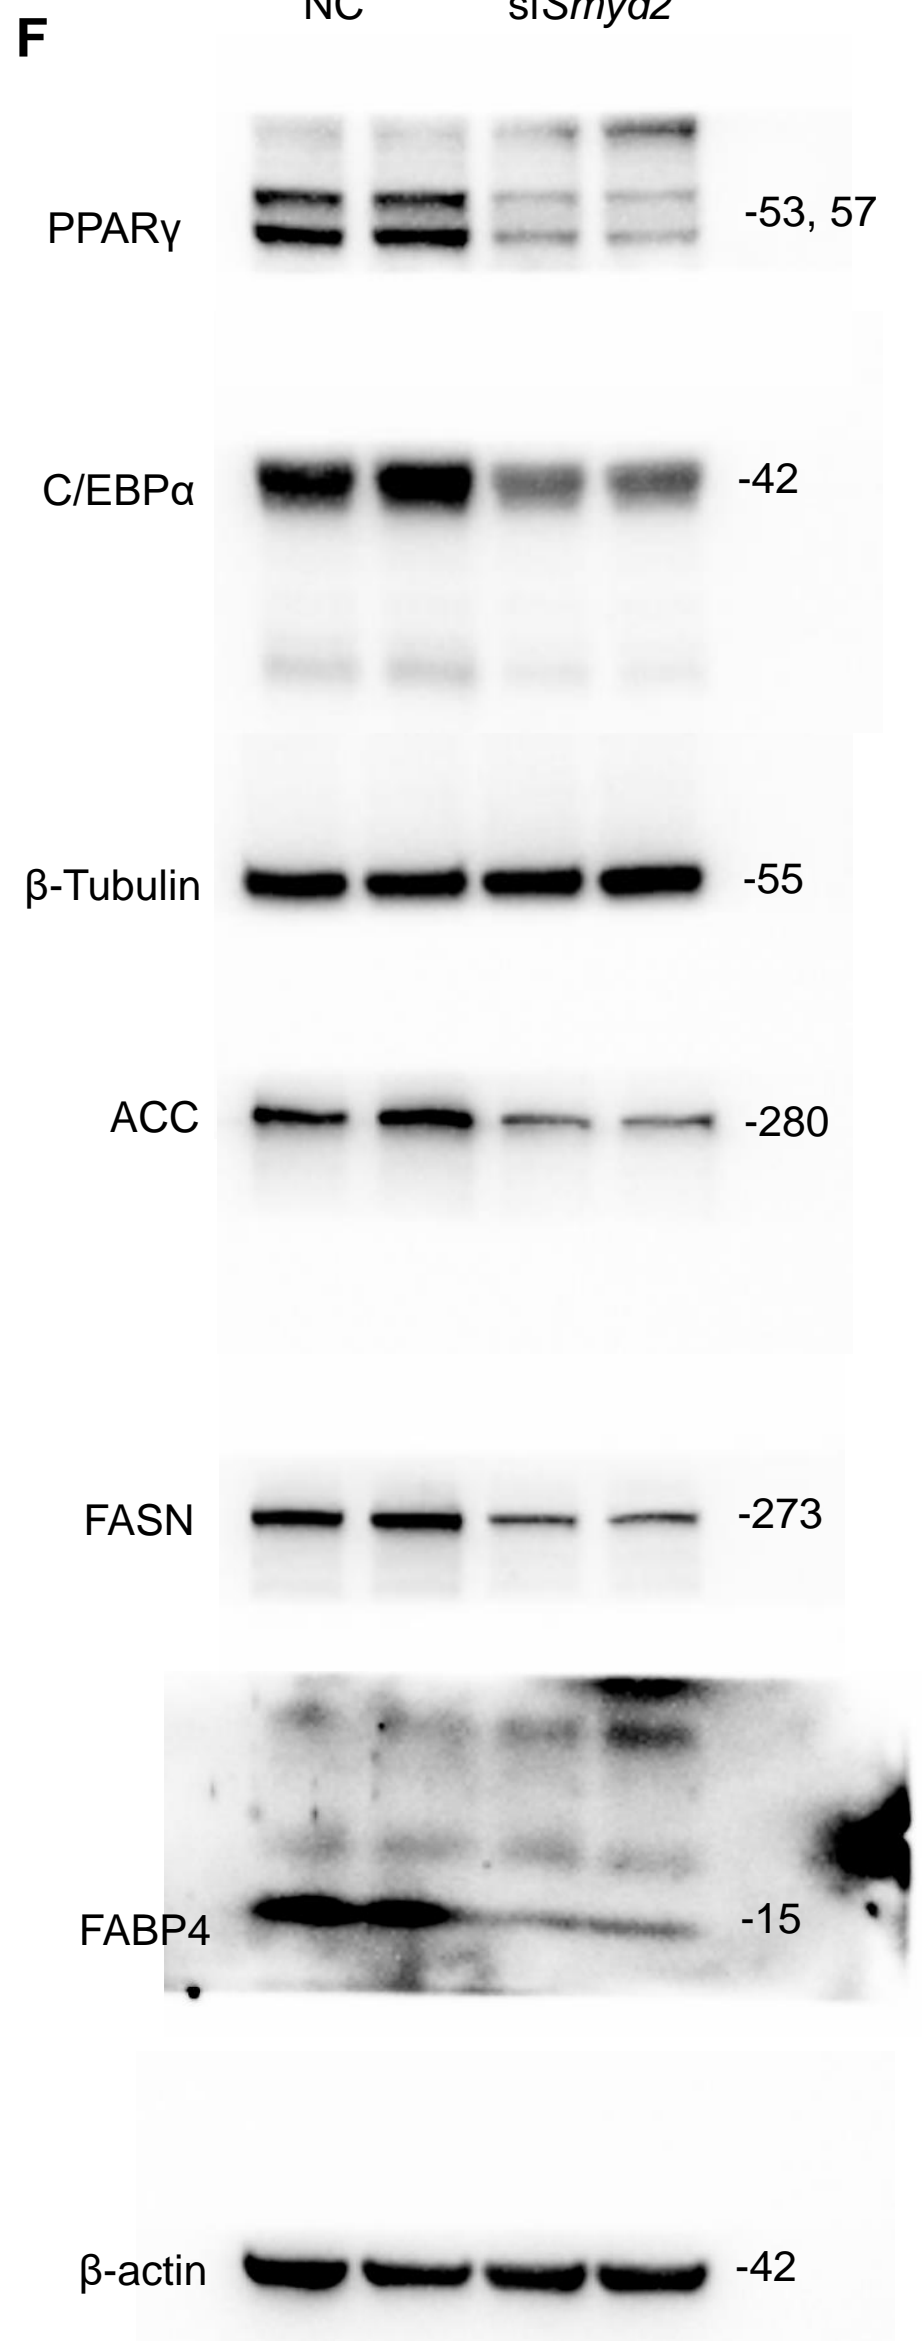

**Figure 3**

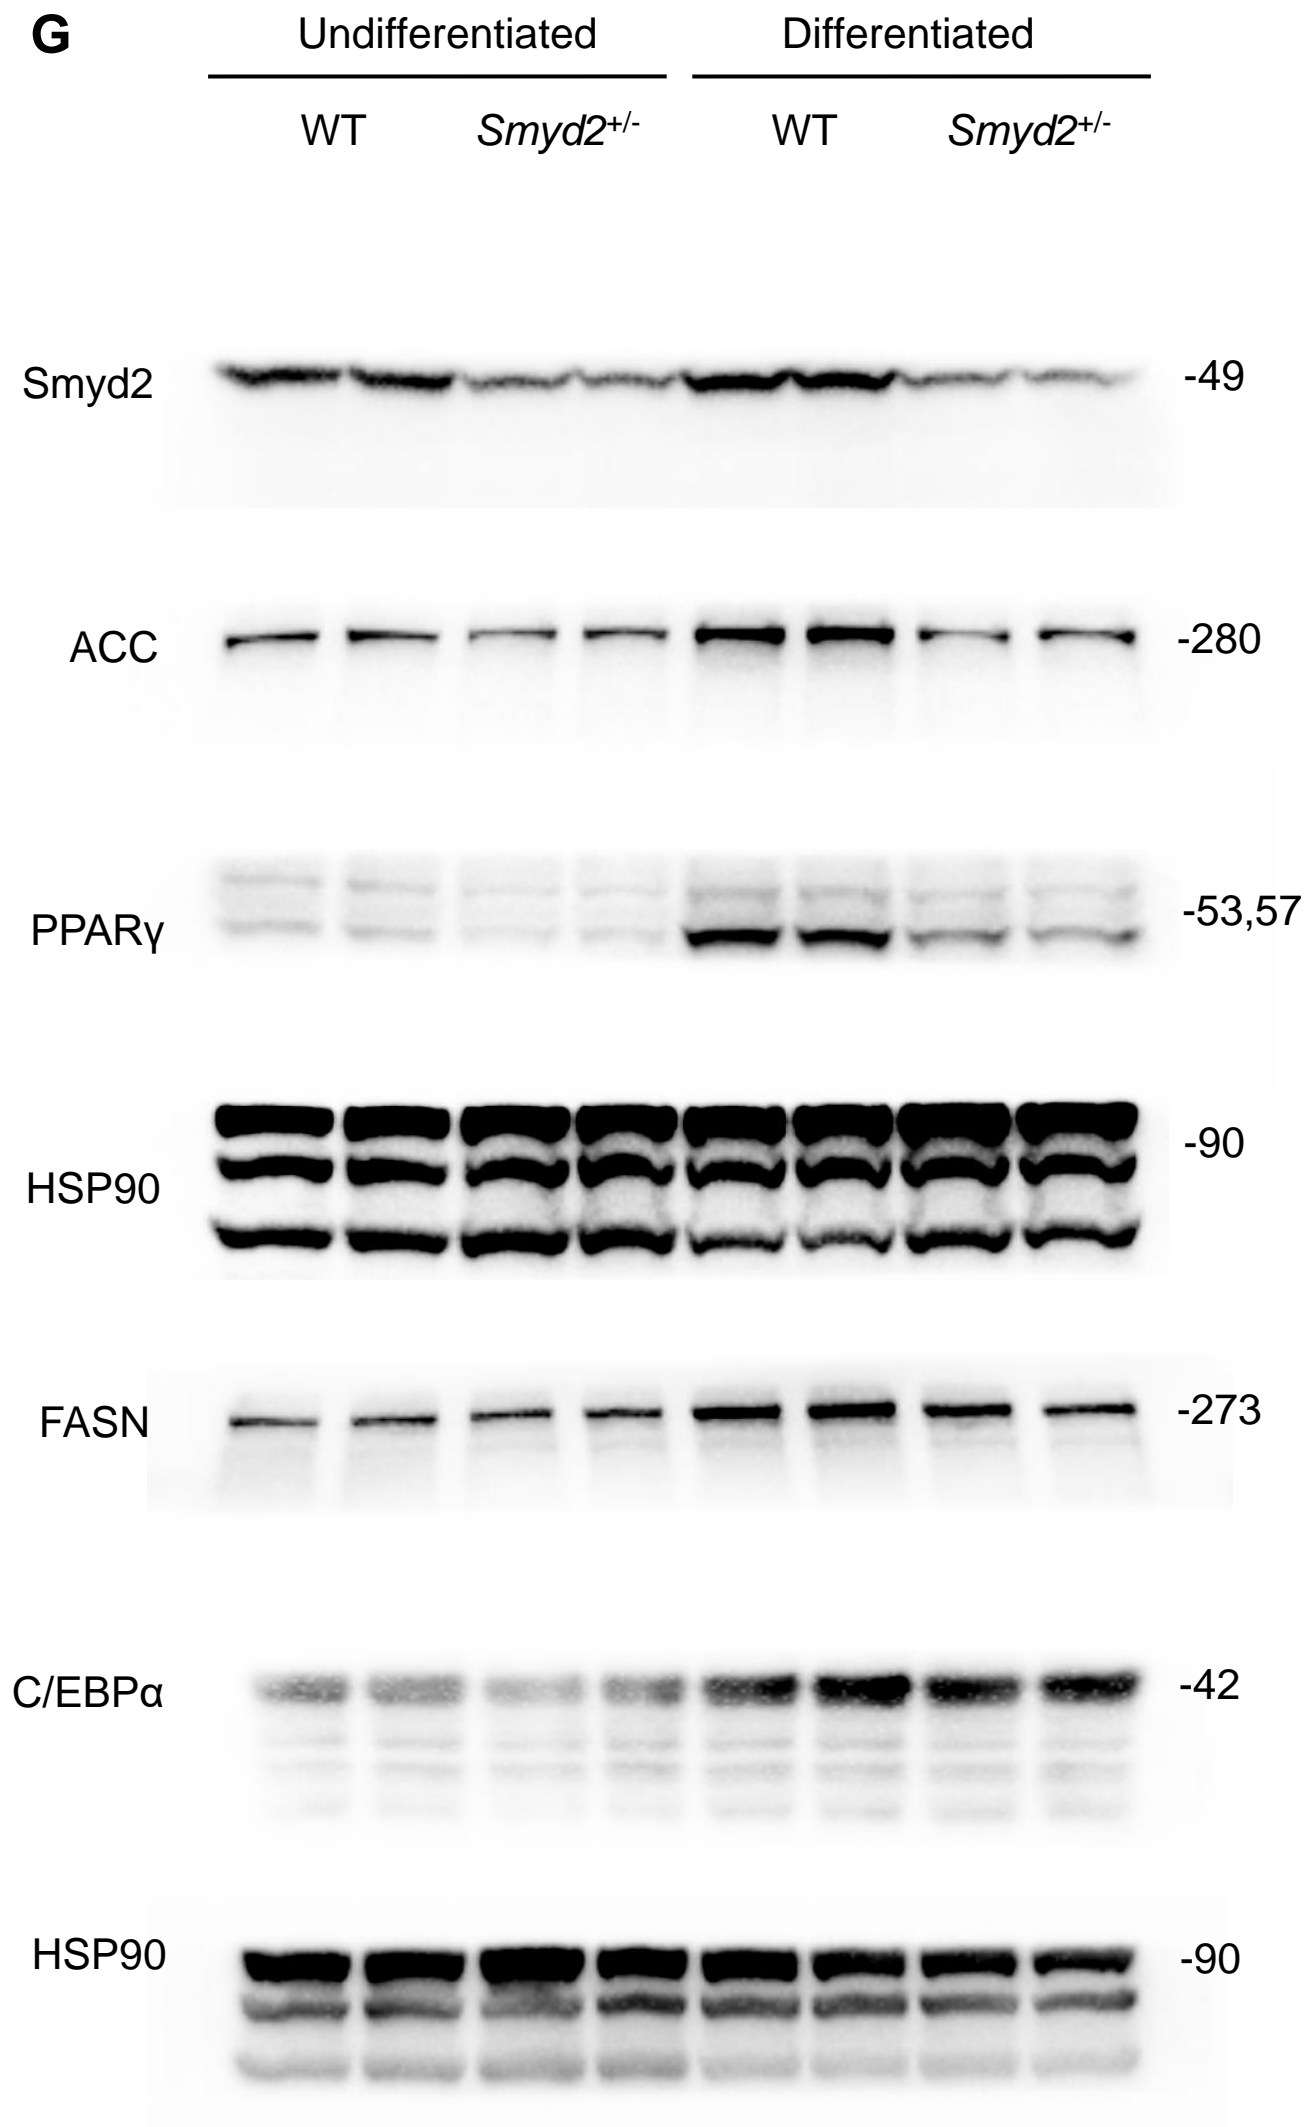

**Figure 4**

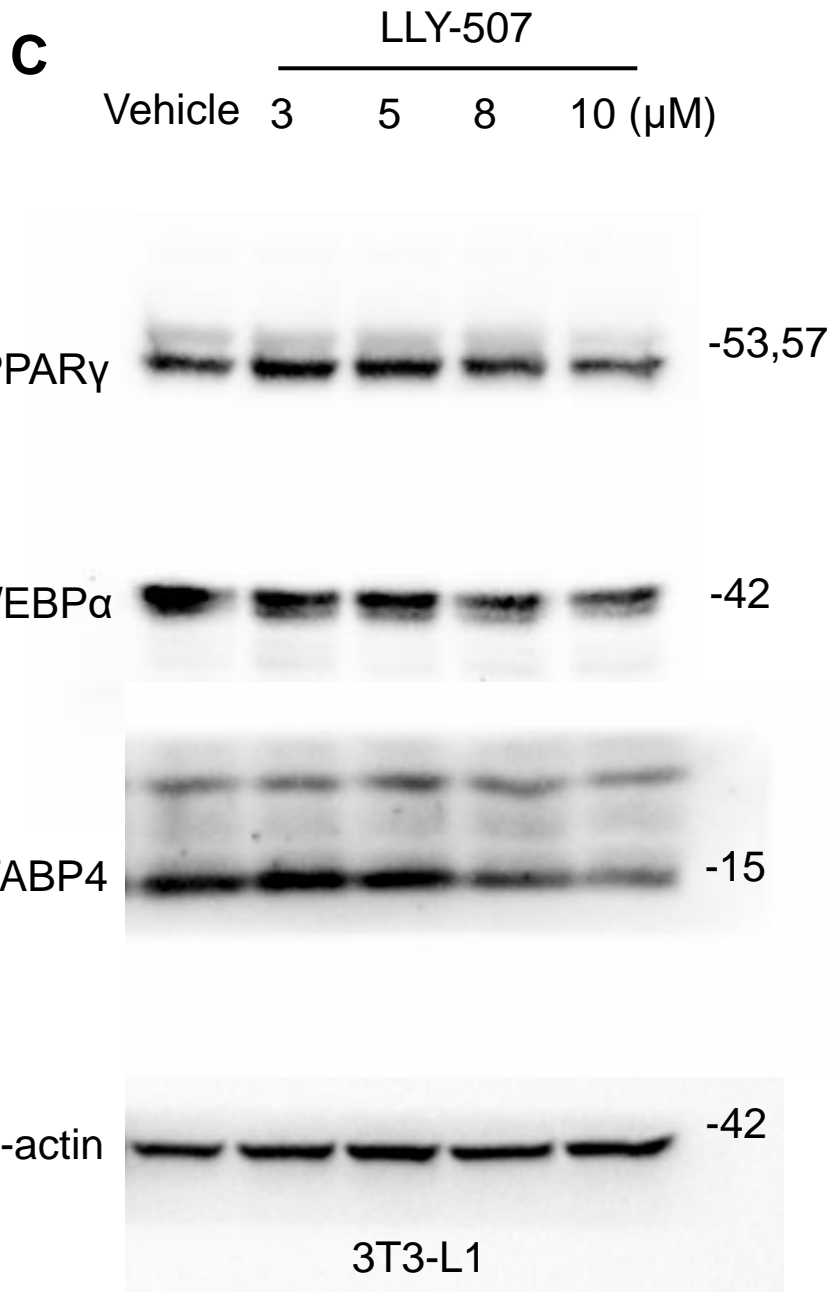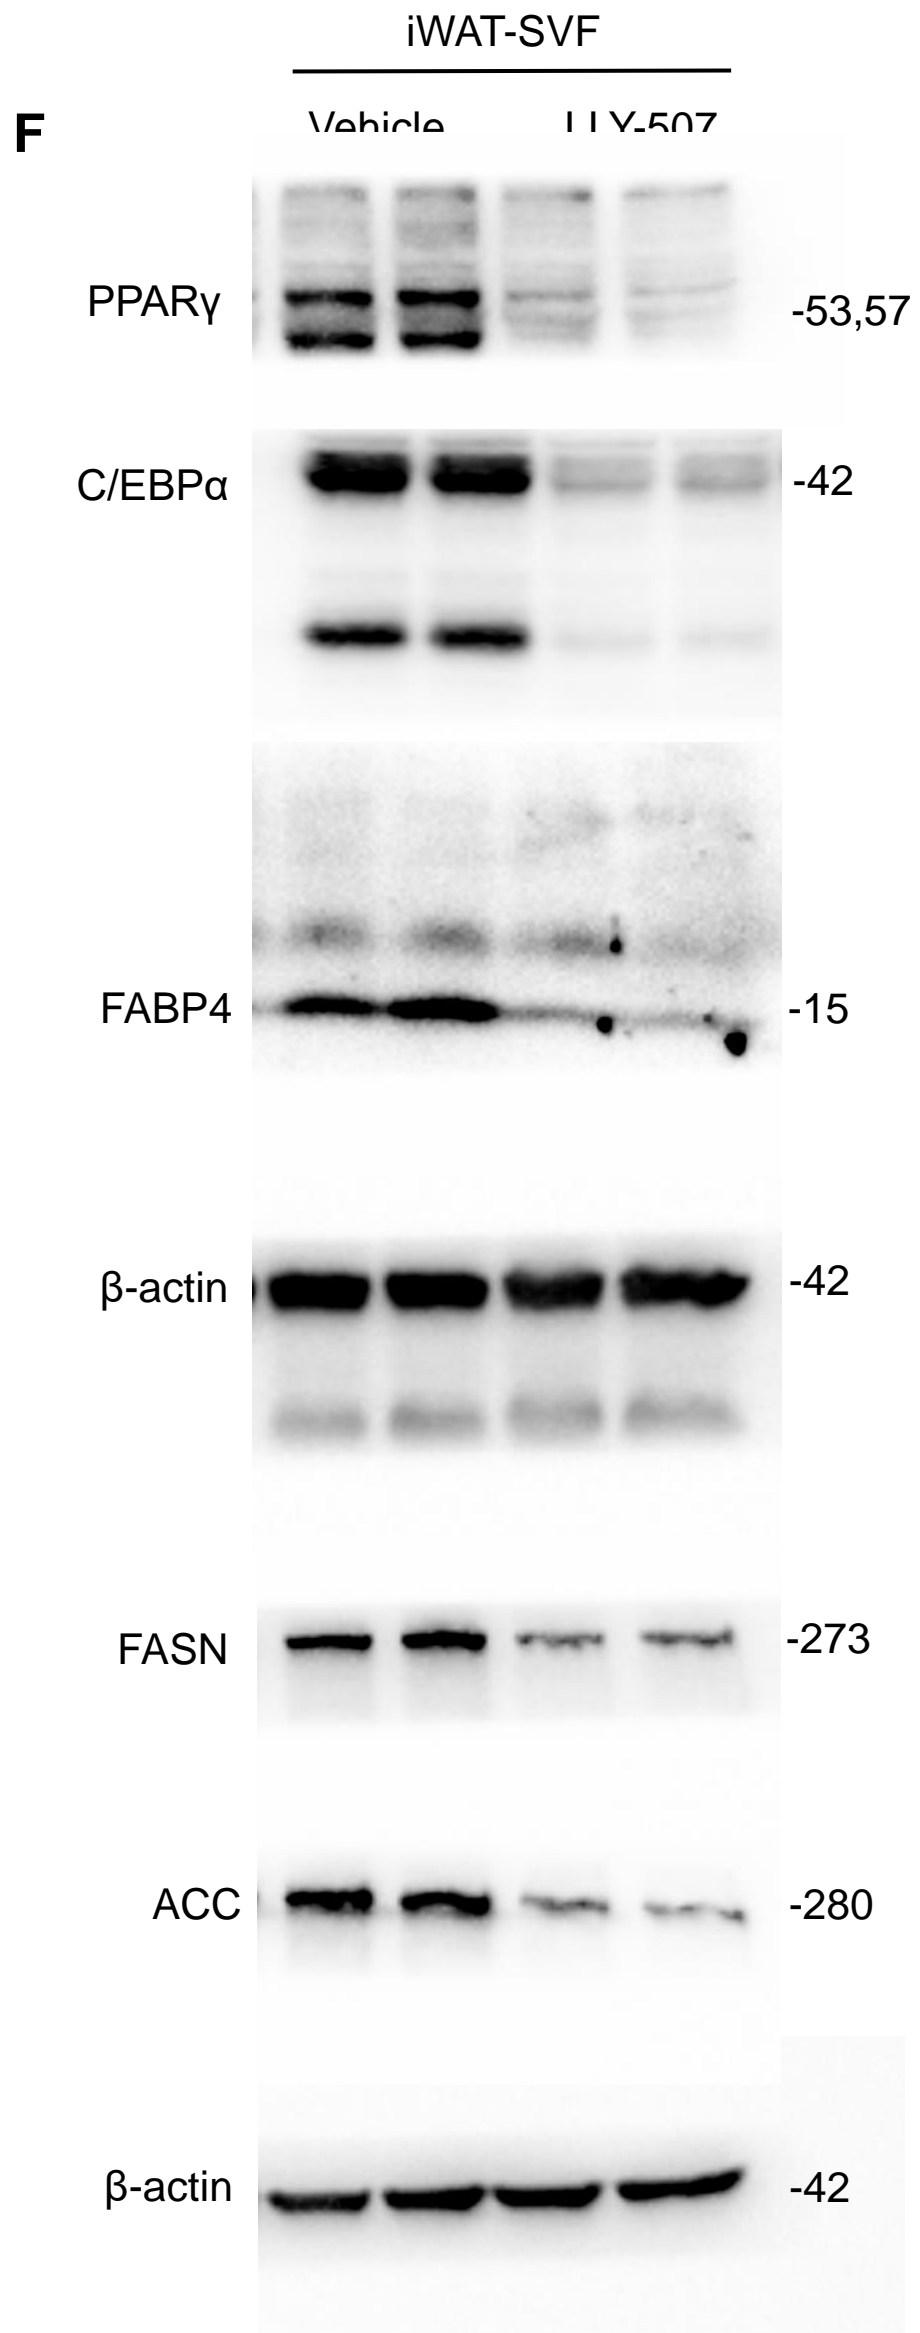

**Figure 5**

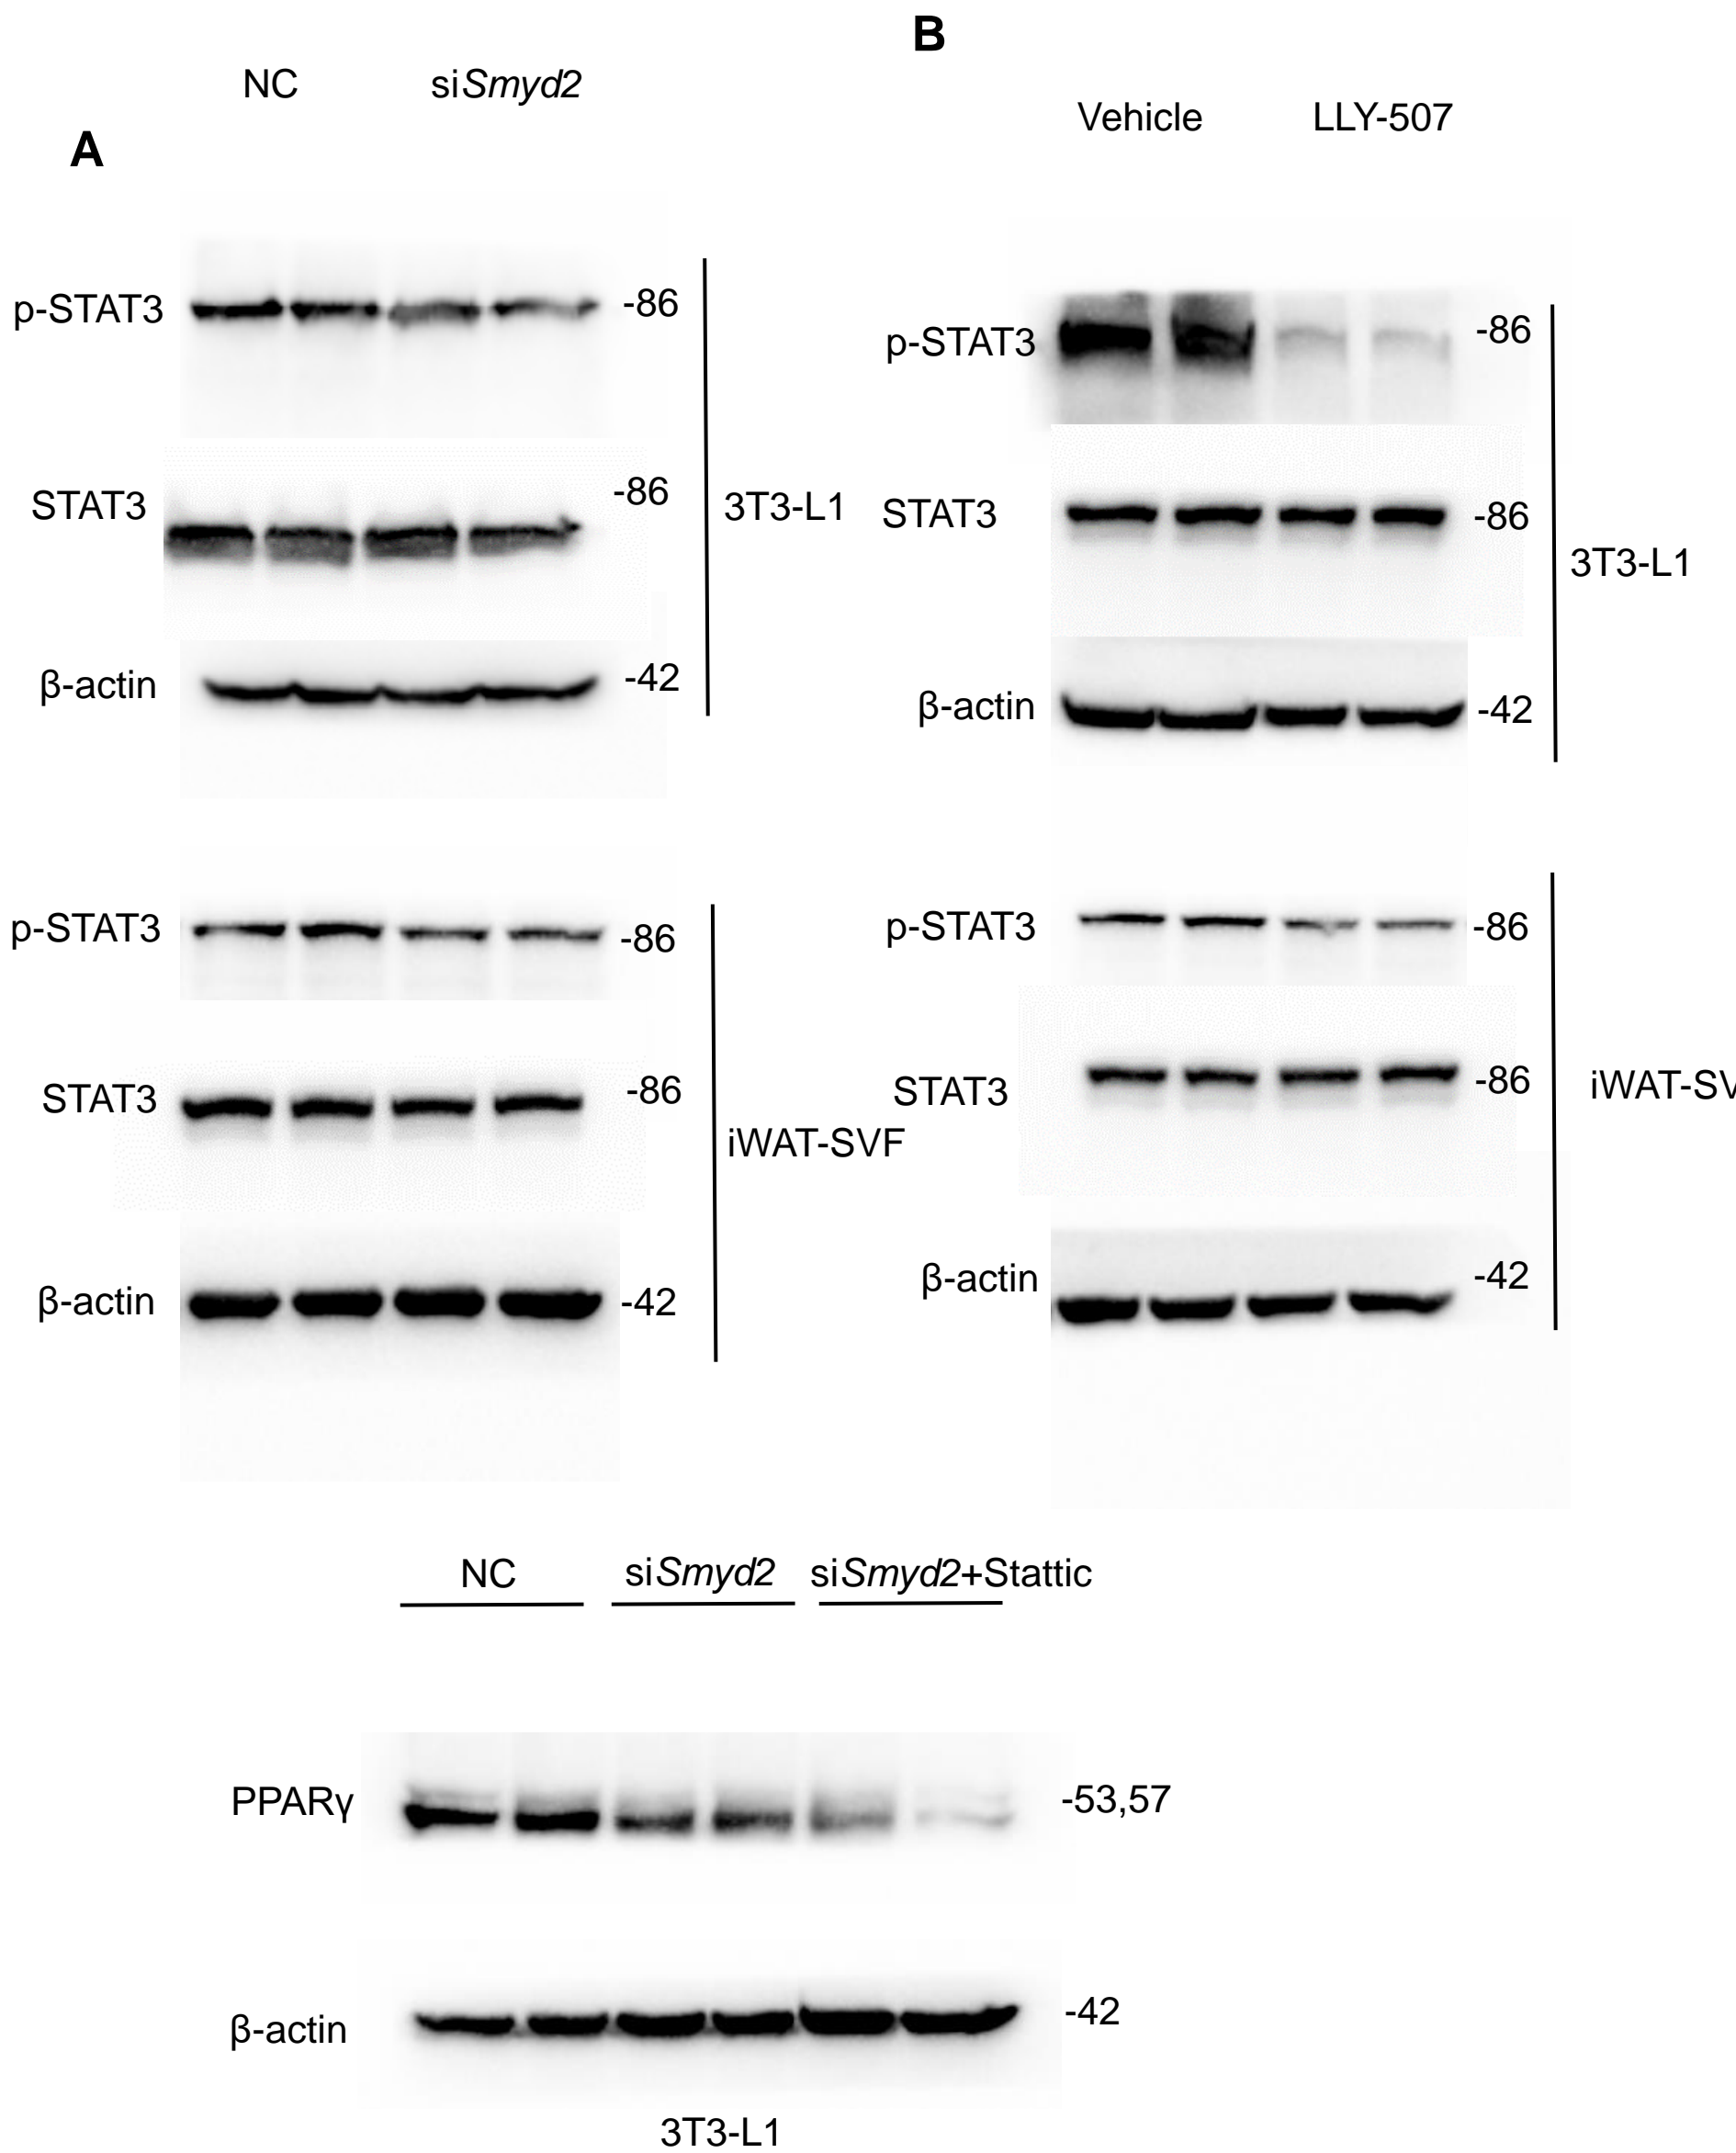

**Figure 6**

**I**

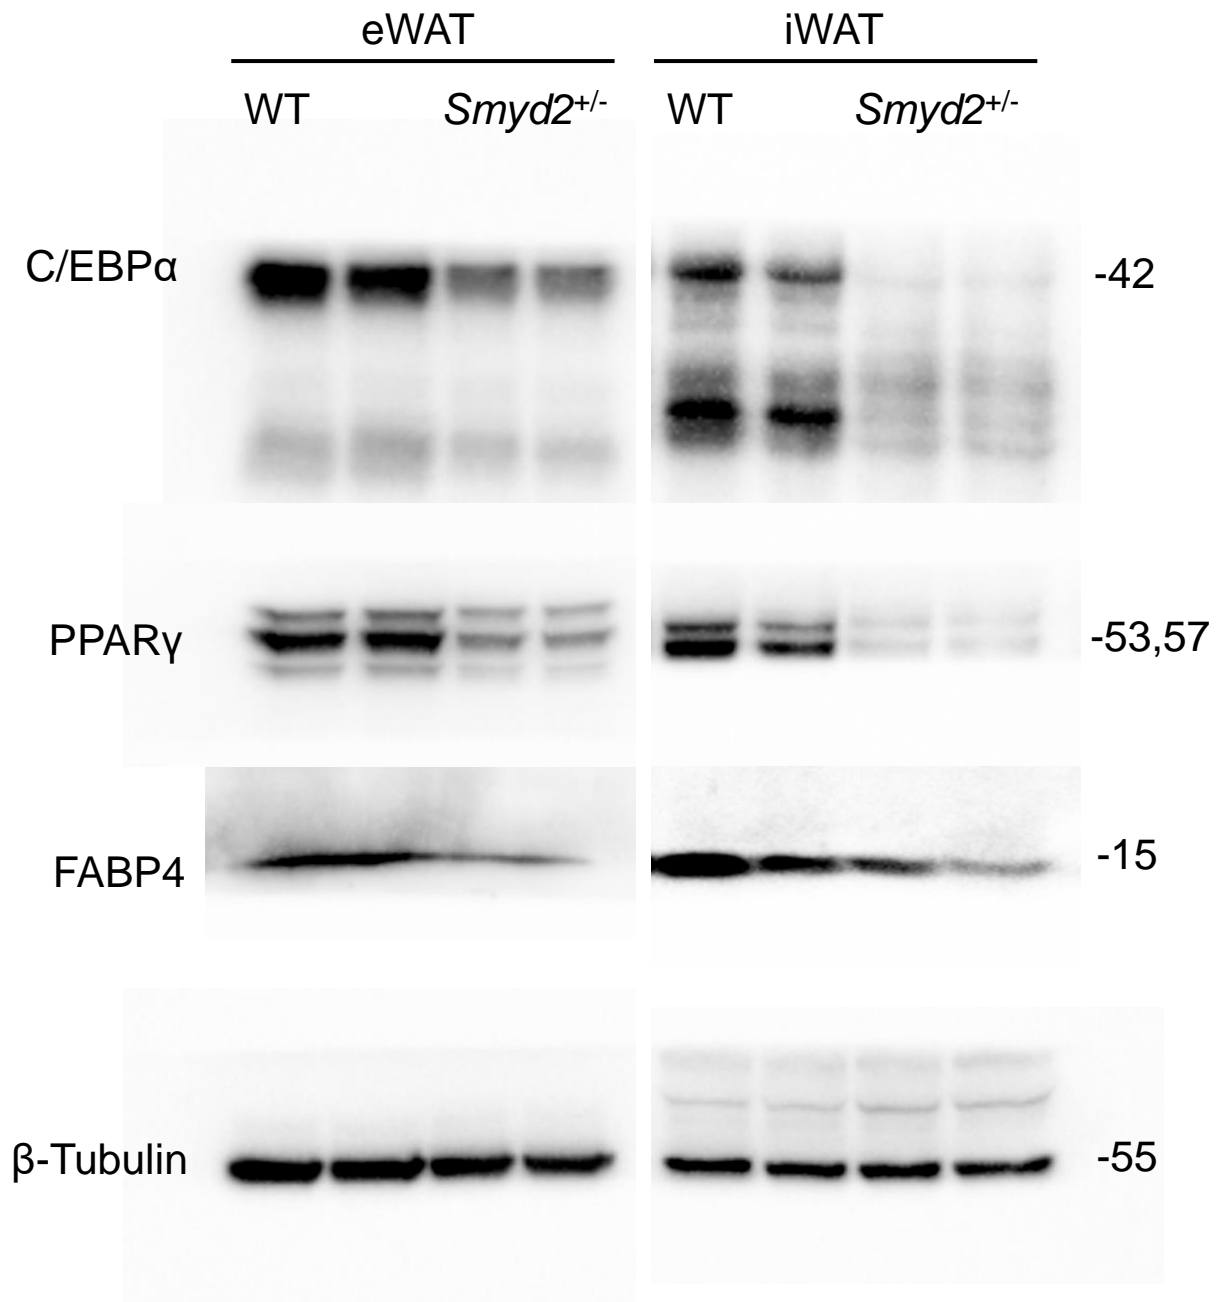

# Figure S1

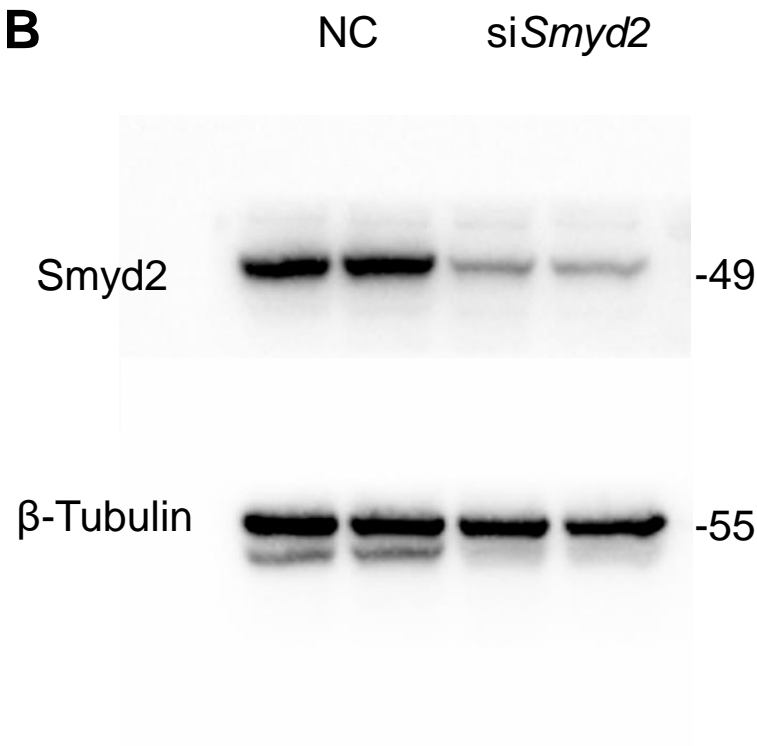



**Figure S2**

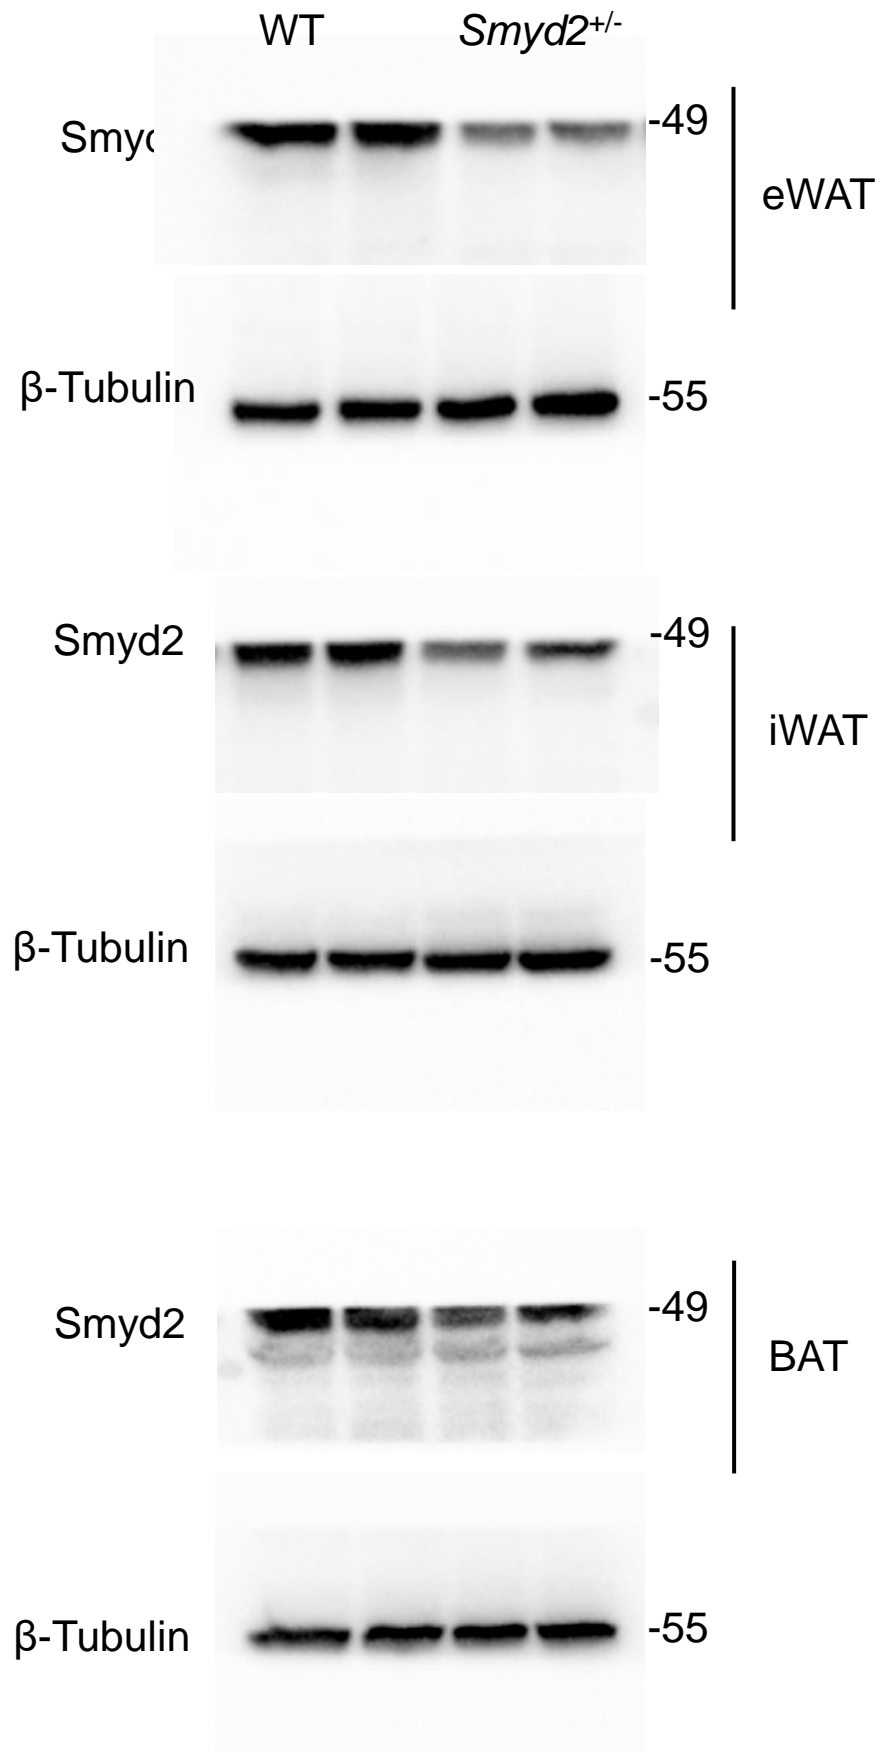

# Figure S3

E

HFD-eWAT

WT

*Smyd2*<sup>+/-</sup>

Smy

-49

PPAR $\gamma$

-53,57

C/EBP $\alpha$

-42

FABP4

-15

HSP90

-90

HFD-iWAT

WT

*Smyd2*<sup>+/-</sup>

Smyd2

-49

PPAR $\gamma$

-53,57

C/EBP $\alpha$

-42

FABP4

-15

HSP90

-90

HFD-BAT

WT

*Smyd2*<sup>+/-</sup>

Smyd2

-49

PPAR $\gamma$

-53,57

HFD-BAT

WT

*Smyd2*<sup>+/-</sup>

C/EBP $\alpha$

-42

FABP4

-15

HSP90

-90

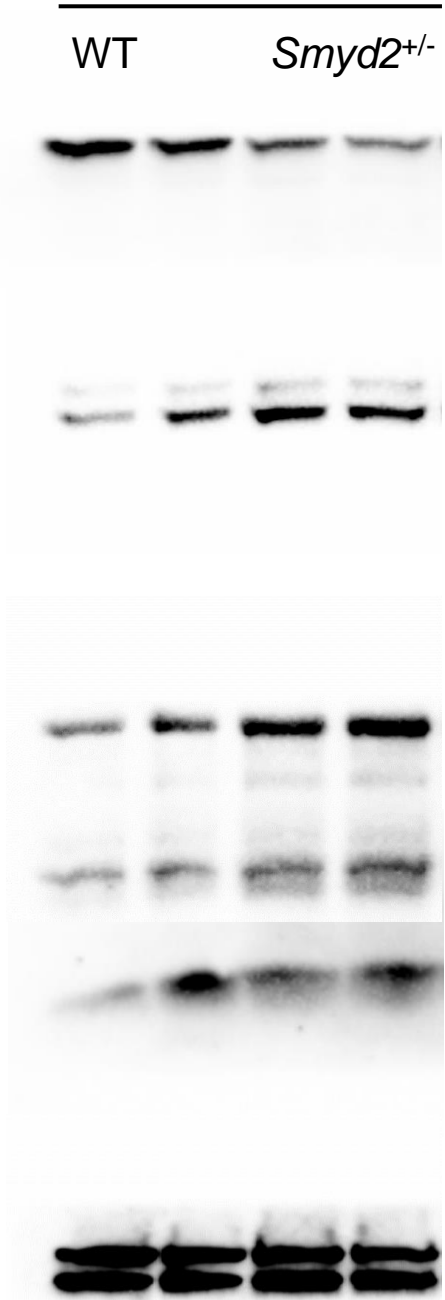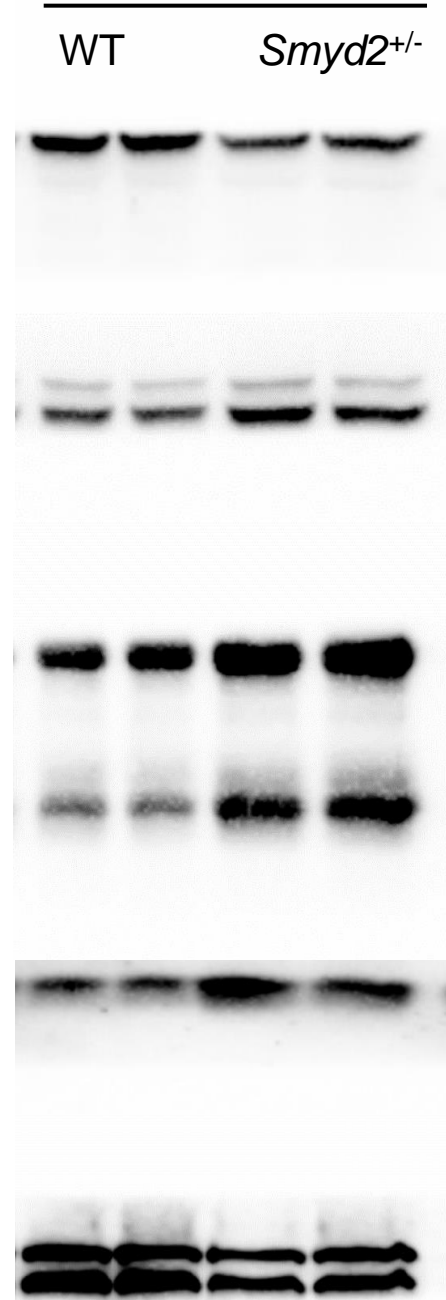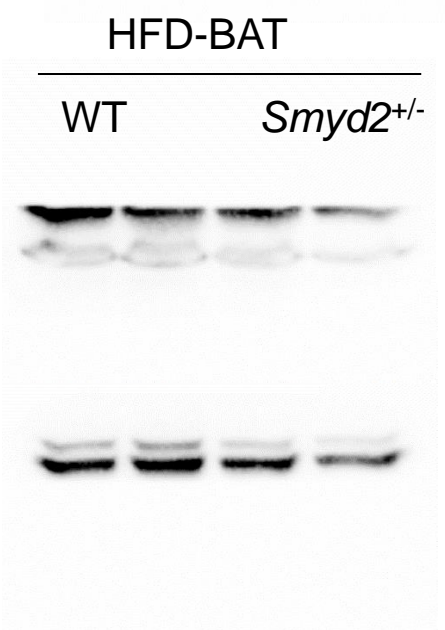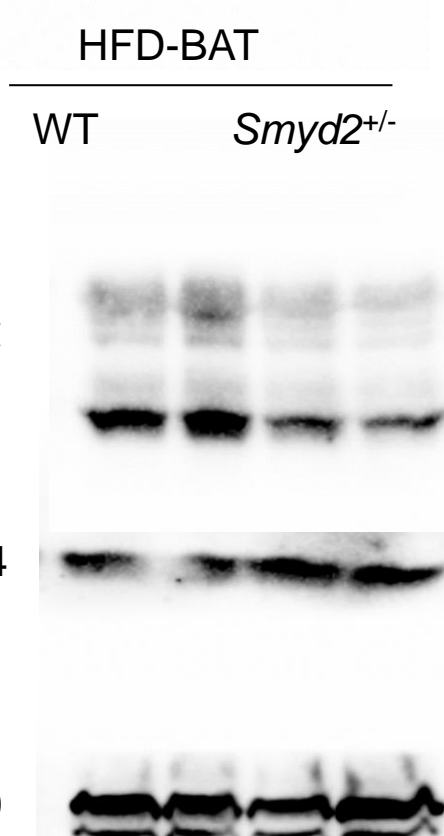

**Figure S4**

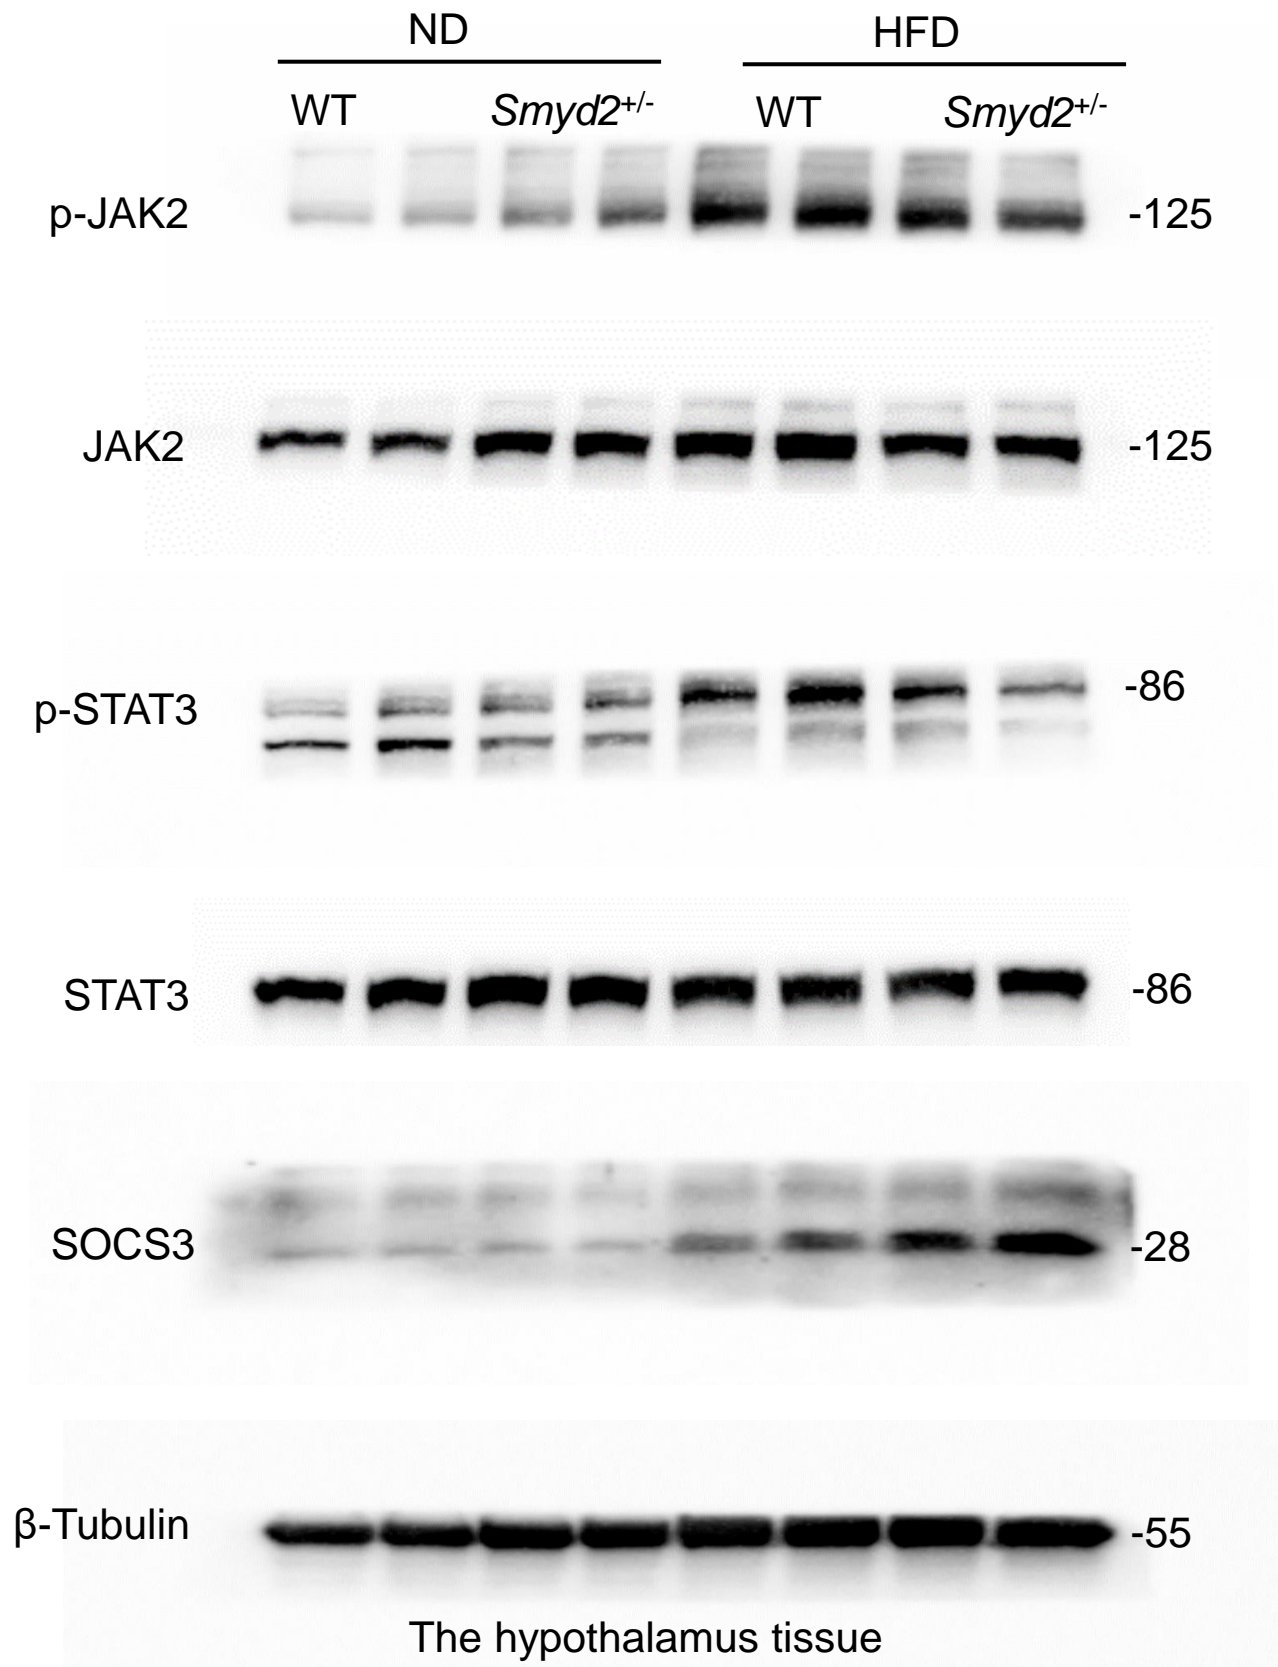

Supplement: 41419_2022_5321_MOESM3_ESM.pdf [file 41419_2022_5321_MOESM3_ESM.pdf]
